# Supplementary material for: Clipping Effect on the Grain Nitrogen and Protein Fractions of Ancient and Old Wheats Grown in a Mediterranean Environment
Source: MDPI journal article supplement (doi:10.3390/foods12132582), 2023-07-02
Supplement: s1 [file s1]

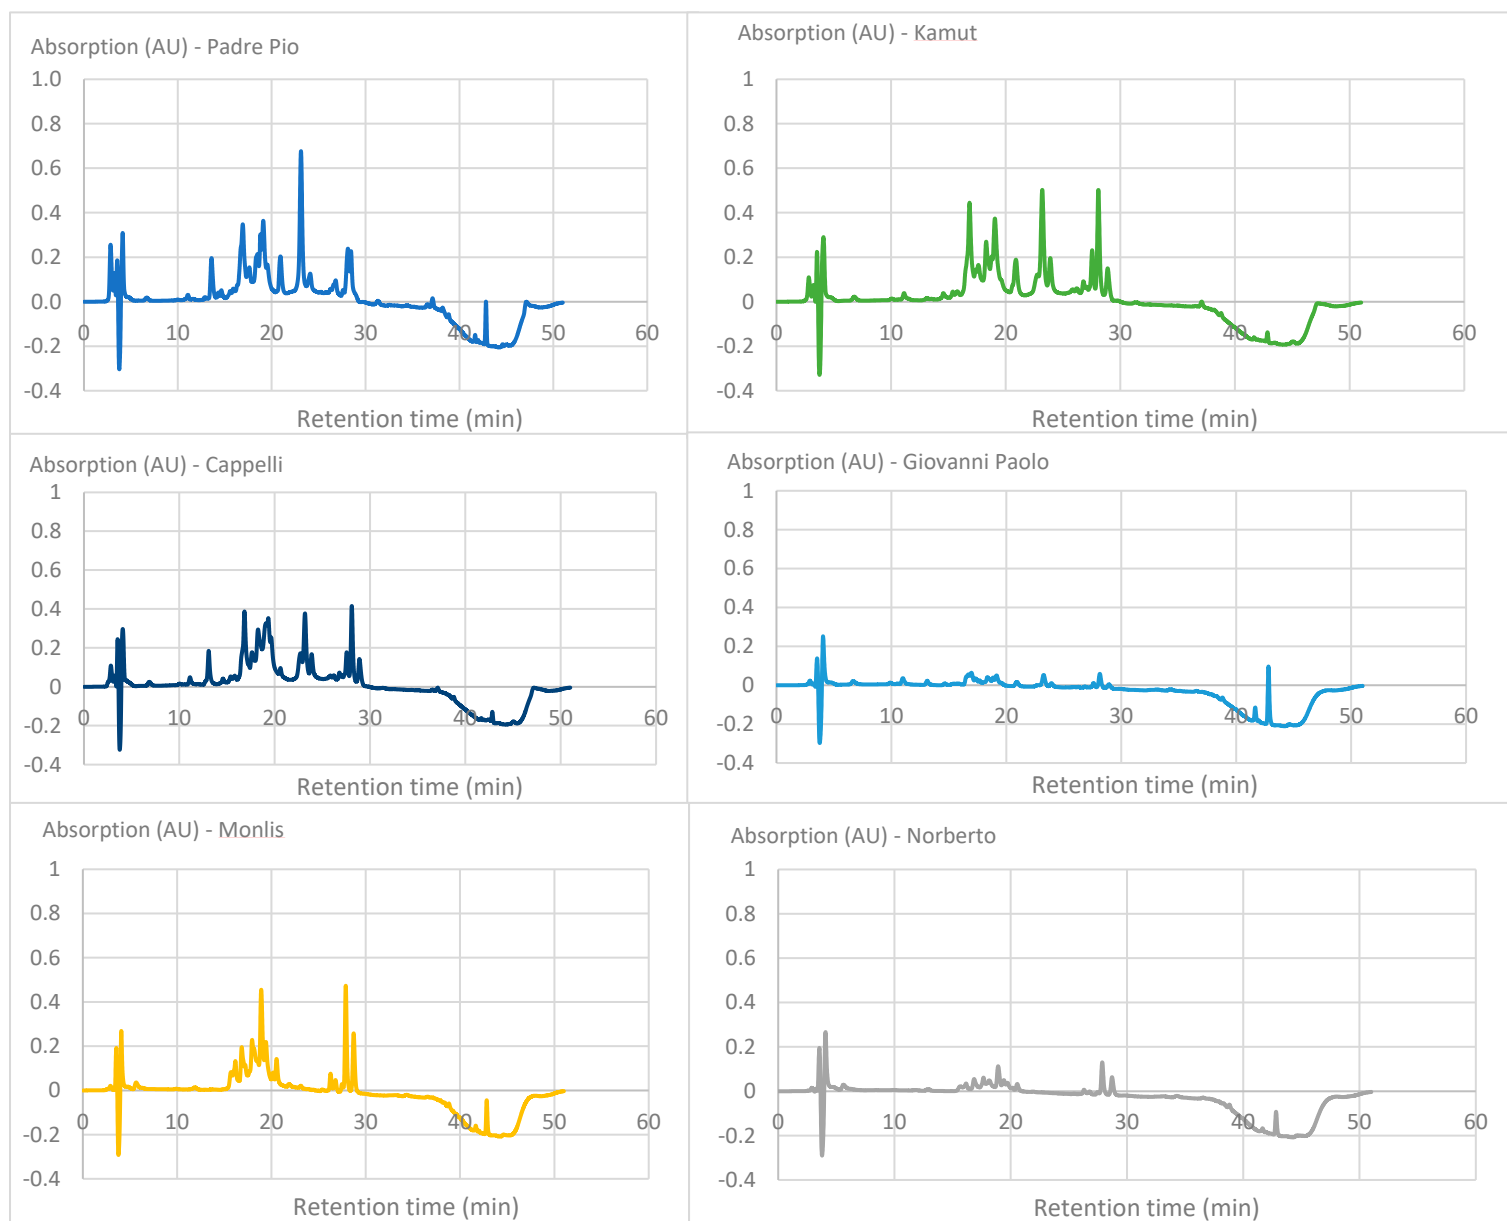

**Figure S1.** RP-HPLC chromatograms representing the area under the curve of the gliadins during the 60 minutes of separation of the six cultivars studied, Padre Pio, Norberto, Monlis, Giovanni Paolo, Kamut and Cappelli.

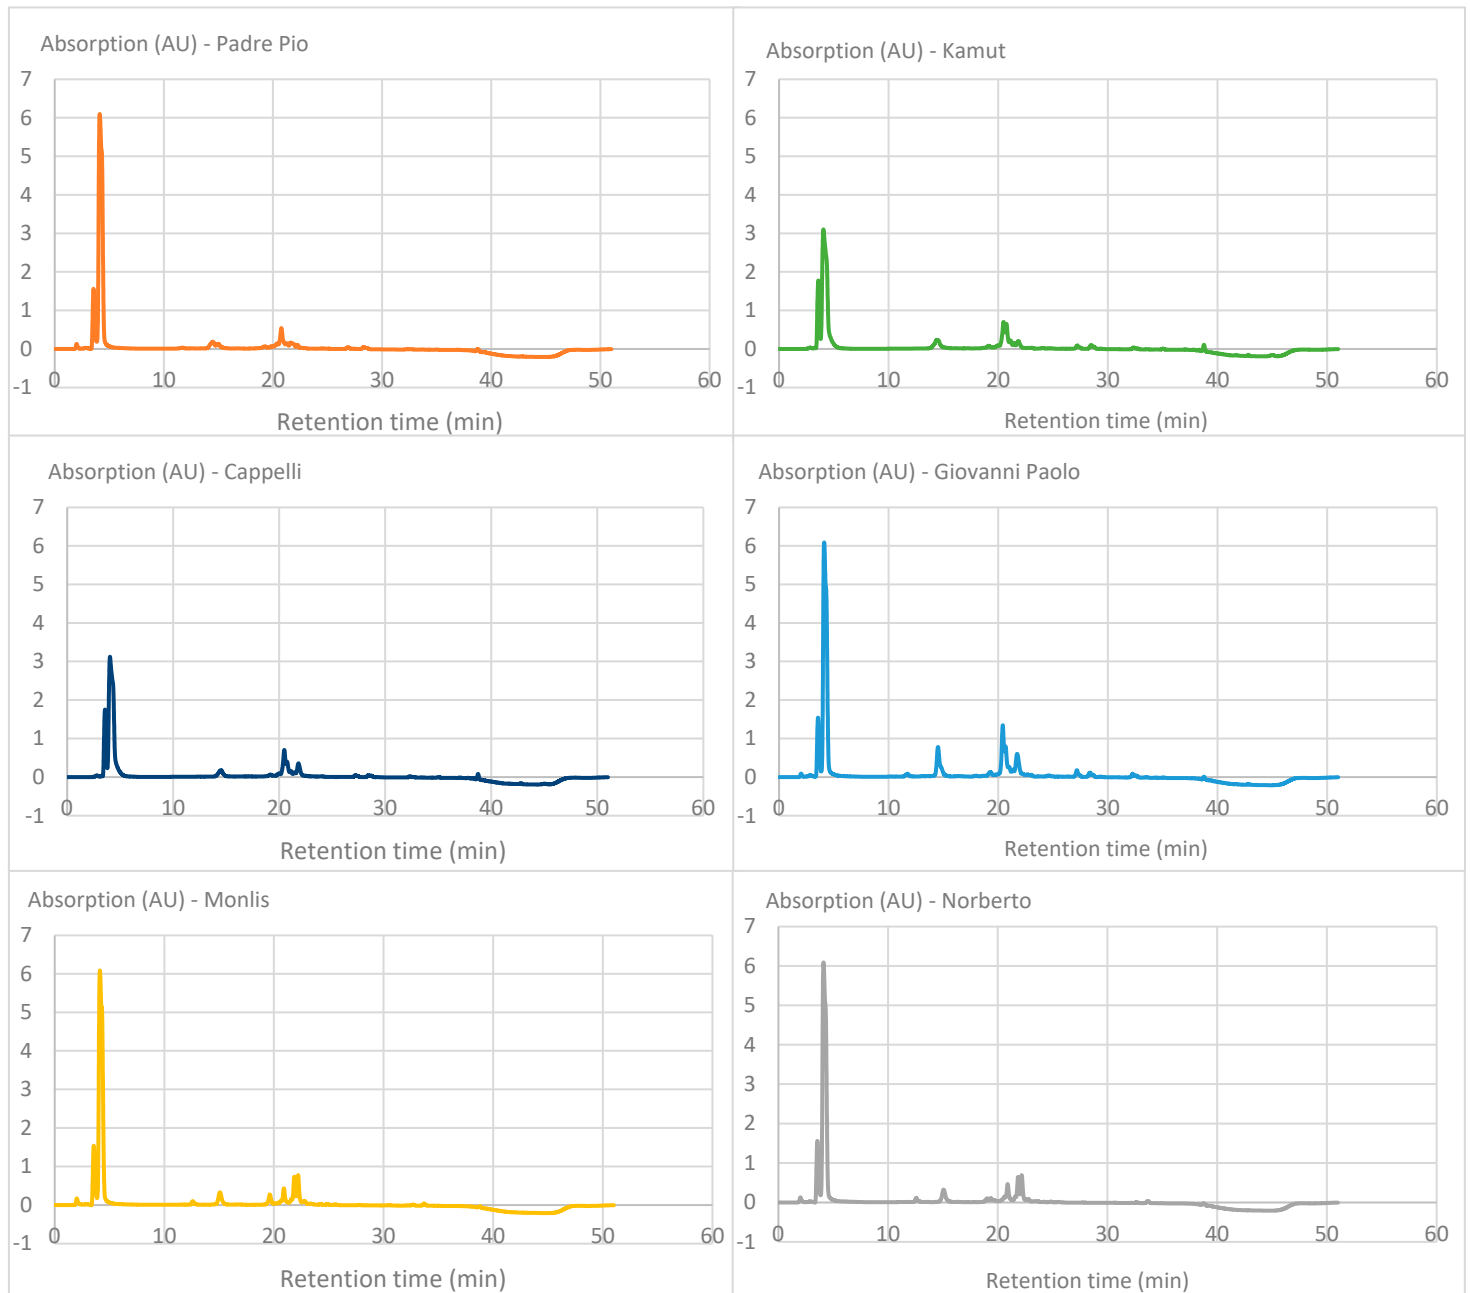

**Figure S2.** RP-HPLC chromatograms representing the area under the curve of the glutenins during the 60 minutes of separation of the six cultivars studied, Padre Pio, Norberto, Monlis, Giovanni Paolo, Kamut and Cappelli.
